# Supplementary material
Source: PubMed Central journal article supplement (PMC4261001)

## 1 **Repository materials and methods**

2 **Reagents:** Cholera toxin (CT) was purchased from List Biological Laboratories Inc (Campbell,  
3 CA). Concanavalin A (Con A), collagenase and avidin-peroxidase were purchased from Sigma-  
4 Aldrich (St. Louis, MO). DNase I was purchased from Roche (Branford, CT). Antibodies for  
5 ELISA were purchased from BD Pharmingen (San Diego, CA) or R&D Systems (Minneapolis,  
6 MN). DNA methylation reagents were purchased from Qiagen (Germantown, MD).

7  
8 **Crude peanut extract preparation:** Freshly ground, whole roasted peanut and crude peanut  
9 extract (CPE) were prepared as described previously.<sup>(1;2)</sup> Endotoxin levels in ground peanut were  
10 tested using the Pyrogen Plus assay kit (Lonza, Basel, Switzerland) as previously  
11 described<sup>(3)</sup> and were below the detectable level. Briefly, peanuts were ground with a coffee  
12 grinder (Krupps, Peoria, IL) followed by mortar and pestle to make a smooth paste. The paste was  
13 defatted by washing with at least 20 volumes (wt/vol) of cold acetone and air dried overnight at  
14 4°C. Protein was extracted from dried powder by agitating in PBS supplemented with a protease-  
15 inhibitor cocktail without EDTA (Roche Diagnostics, IN) overnight at 4°C. After centrifugation  
16 at 2500g for 20 minutes at 4°C, the supernatant was collected, filtered, and centrifuged at  
17 12,000g for 3 minutes. Protein concentrations were determined with a Micro BCA Protein Assay  
18 Kit (Thermo Scientific, IL). Extract was stored at -80°C.

19  
20 **Evaluation of anaphylaxis:** Anaphylactic symptoms were evaluated 30 minutes following oral  
21 challenge utilizing the scoring system described previously<sup>(4)</sup>: 0 - no symptoms; 1 - scratching  
22 and rubbing around the snout and head; 2 - puffiness around the eyes and snout, pilarerecti,  
23 reduced activity, and/or decreased activity with increased respiratory rate; 3 - wheezing, labored  
24 respiration, cyanosis around the mouth and the tail; 4 - no activity after prodding, or tremor and

25 convulsion; 5 - death. Cage identities were concealed during visual assessment of anaphylactic  
26 symptoms.

27 **Determination of global DNA methylation:** Genomic DNA from MLN cells was purified as  
28 described in “DNA pyrosequencing methylation analysis” in the Methods section. Global DNA  
29 methylation was determined using the MethylFlash Methylated DNA Quantification Kit  
30 (Colorimetric) (Epigentek Group Inc., New York, NY).<sup>(5)</sup> This kit measures the methyl-cytosine  
31 content as a percentage of total cytosine content. Using a DNA concentration of 20 µg/ml, the  
32 purified DNA was added to wells in an ELISA plate. The methylated fraction of DNA was  
33 quantified using 5-methylcytosine specific antibodies. The amount of methylated DNA was  
34 proportional to the OD intensity in an ELISA plate reader at 450 nm. DNA methylation was  
35 calculated using the formula:  $[(OD_{\text{sample}} - OD_{M3})/S] / [((OD_{M4} - OD_{M3}) \times 2)/P] \times 100$ ; where OD is  
36 optical density; M3 is the negative control, an unmethylated polynucleotide containing 50% of  
37 cytosine; S is the amount of input sample DNA in ng; M4 is the positive control, a methylated  
38 polynucleotide containing 50% of 5-methylcystosine; P is the amount of input positive control  
39 in ng. The amount of methylated DNA was expressed as percentage of total DNA.

#### 40 **Figure Legend**

41 **Figure E1:** Peanut allergic mothers exhibited hypersensitivity reactions following oral peanut  
42 challenge and prior to mating. Blood was collected from peanut allergic mothers (PAM) and  
43 naïve mothers (NM) one day prior to challenge. Serum peanut-specific IgE levels (A) were  
44 measured by ELISA. Anaphylactic scores (B) and core body temperatures (C) were measured,  
45 and plasma histamine levels (D) were determined thirty minutes after challenge. \*\*, p<0.01; \*\*\*,  
46 p<0.001, vs. NM (N=5/group). Each dot represents an individual mouse. Horizontal bars indicate  
47 means. Data shown are representative of two individual experiments.

48

49 **Figure E2:** Following oral challenge, anaphylactic scores and core body temperatures with or  
50 without anti-Fc $\gamma$ R1IB/R1II monoclonal antibody administration in peanut sensitized offspring of  
51 peanut allergic mothers. N=5-6. \*, p<0.05. Horizontal lines represent the means of each group.

52

53 **Figure E3:**A: Global methylation of MLN cells in O-PAM, O-NM and normal controls  
54 following challenge was measured by the global DNA methylation ELISA kit( Epigentek,  
55 Farmingdale, NJ). In this ELISA kit, the methylated fraction of DNA is recognized by 5-  
56 methylcytosine antibody and quantified through an ELISA-like reaction. (N=6-7/group). Both  
57 p>0.05 for O-PAM vs. O-NM and O-PAM vs. Naïve. B: Purified DNA from sensitized and  
58 challenged offspring MLN cells underwent bisulfite treatment, PCR amplification, and  
59 pyrosequencing. Percent of DNA methylation of the IFN- $\gamma$  and Foxp3 promoters in offspring  
60 MLN cells (B&C). Data are expressed as means  $\pm$  SDs of each group. (N=5-6/group).

61 **Figure E4:** DNA methylation at CpG-408 and CpG-393 sites of the IL-4 promoter from  
62 peripheral blood leucocytes (PBL) of peanut allergic mothers (PAM) and naïve mothers (NM)  
63 prior to breeding. Purified DNA from mothers PBL prior to breeding underwent bisulfite  
64 treatment, PCR amplification, and pyrosequencing. \*\*p < 0.01; \*\*\*p < 0.001 vs. NM (N=5).

65 **Figure E5:** Breast milk was collected from lactating peanut allergic mothers (PAM) and naïve  
66 mothers (NM) when their offspring were 10-15 day-old, using a mouse milking machine  
67 modified in our laboratory. An additional group of PAM lactating mice was inoculated  
68 intragastrically with 10 mg of peanut protein (PAM-PN). Milk was collected 2 hours following  
69 peanut protein feeding. Milk was diluted 1:2 in PBS, and peanut protein levels were detected  
70 using a commercial kit (Neogen Corp, Lansing, Mich). N=3-4. \*\*\*, p<0.001.

71

72

73

74

75

76

## Repository References

77

78

(1) Beyer K, Morrow E, Li XM, Bardina L, Bannon GA, Burks AW et al. Effects of cooking methods on peanut allergenicity. *J Allergy Clin Immunol* 2001; 107(6):1077-81.

79

80

81

(2) Pochard P, Vickery B, Berin MC, Grishin A, Sampson HA, Caplan M et al. Targeting Toll-like receptors on dendritic cells modifies the T(H)2 response to peanut allergens in vitro. *J Allergy Clin Immunol* 2010; 126(1):92-7.

82

83

84

(3) Srivastava KD, Qu C, Zhang T, Goldfarb J, Sampson HA, Li XM. Food Allergy Herbal Formula-2 silences peanut-induced anaphylaxis for a prolonged posttreatment period via IFN-gamma-producing CD8+ T cells. *J Allergy Clin Immunol* 2009; 123(2):443-51.

85

86

87

(4) Li XM, Serebrisky D, Lee SY, Huang CK, Bardina L, Schofield BH et al. A murine model of peanut anaphylaxis: T- and B-cell responses to a major peanut allergen mimic human responses. *J Allergy Clin Immunol* 2000; 106(1 Pt 1):150-8.

88

89

90

91

92

(5) Fernandez-Roig S, Lai SC, Murphy MM, Fernandez-Ballart J, Quadros EV. Vitamin B12 deficiency in the brain leads to DNA hypomethylation in the TCb1R/CD320 knockout mouse. *Nutr Metab (Lond)* 2012; 9:41.

**Supplement Table I. Primers used for PCR amplification and pyrosequencing experiments**

---

**Mouse Foxp3**

PCR forward TATATTTTTAGATGATTTGTAAAGGGTAAA

PCR reverse Biotin-TCACCTTAATAAAATAAACTACTA

Pyrosequencing AAAAAATTGGATTATTAGAA

**Mouse IFN- $\gamma$**

PCR forward TGGTGTGAAGTAAAAGTGTTTTAGA

PCR reverse Biotin-TACACCTCTCTAACTTCCAATTT

Pyrosequencing 1 AAAAAAATTTGTGAAAATA

Pyrosequencing 2 GAATGGTATAGGTGGGTA

---

**A**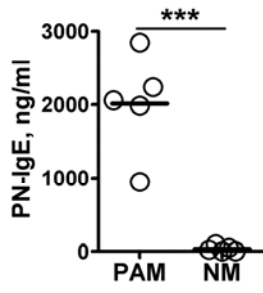**B**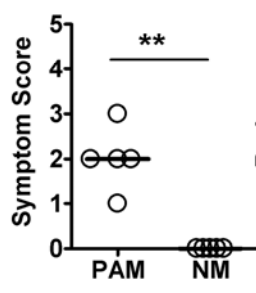**C**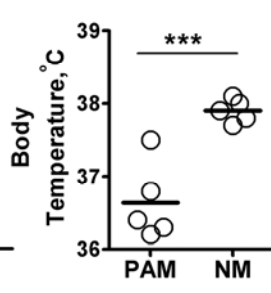**D**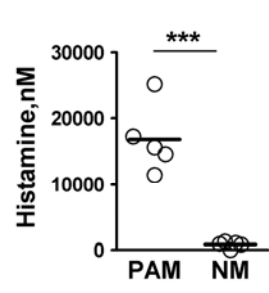

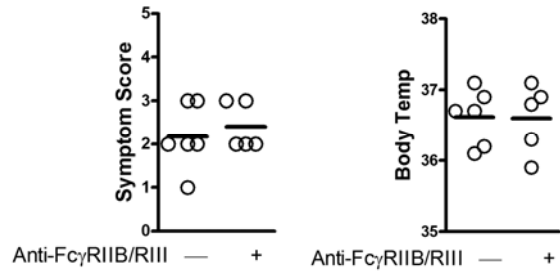

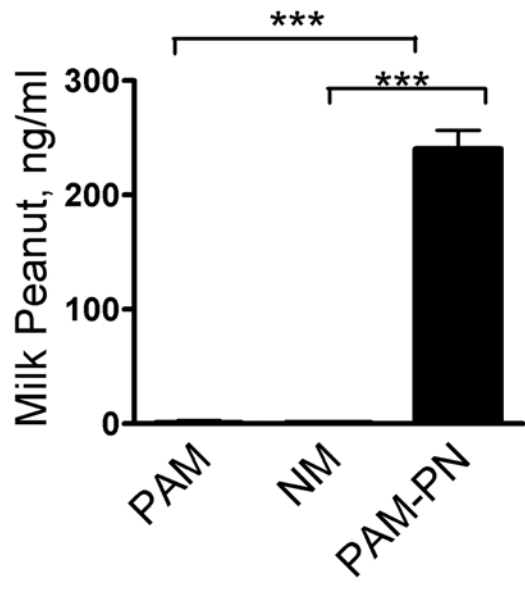



### A Global DNA

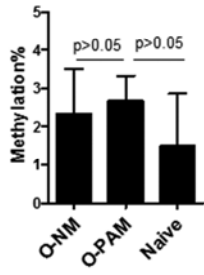

### B IFN- $\gamma$ promoter

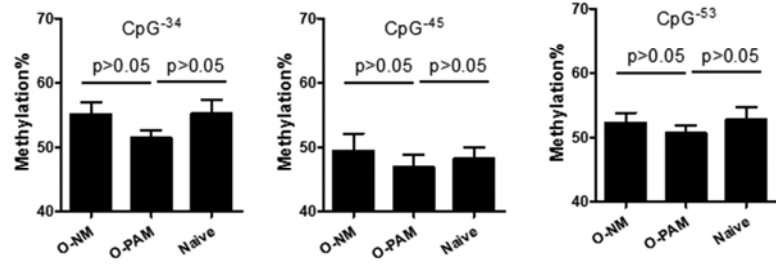

### C Foxp3 promoter

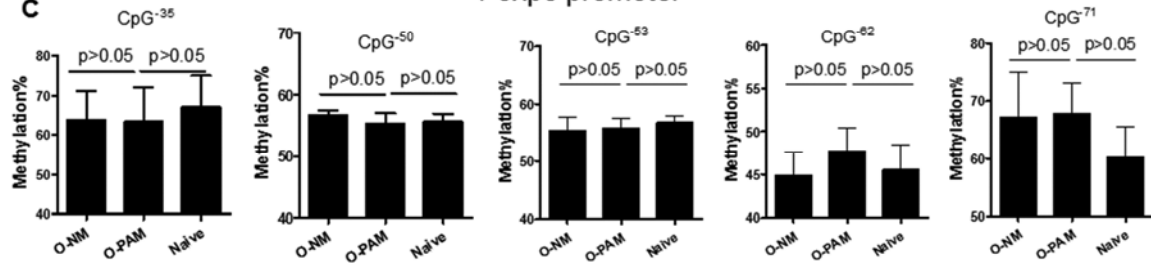

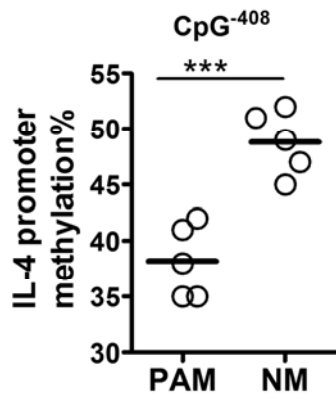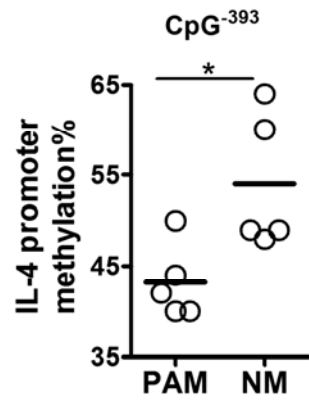

Supplement: NIHMS628658-supplement-supplement_1.pdf [file NIHMS628658-supplement-supplement_1.pdf]
